# Supplementary material for: Synthesis, Crystal Structure, and Computational Methods of Vanadium and Copper Compounds as Potential Drugs for Cancer Treatment
Source: PubMed Central journal article supplement (PMC7587343; doi:10.3390/molecules25204679), 2020-10-14
Supplement: molecules-25-04679-s001.pdf [file molecules-25-04679-s001.pdf]

## Supplementary Material

Nidia D. Corona-Motolinia<sup>1</sup>, Beatriz Martínez-Valencia<sup>1</sup>, Lisset Noriega<sup>2</sup>, Brenda L. Sánchez-Gaytán<sup>1</sup>, Miguel Ángel Méndez-Rojas<sup>3</sup>, Francisco J. Meléndez-Bustamante<sup>2</sup>, María Eugenia Castro<sup>1\*</sup>, and Enrique González-Vergara<sup>1\*</sup>

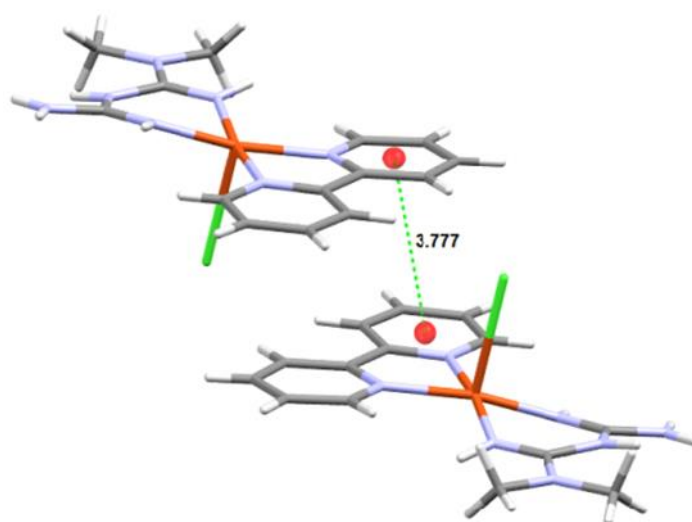

**Figure S1.** Capped stick representation of **Compound 1**, showing the distance between centroids of adjacent rings of bipyridine molecules.

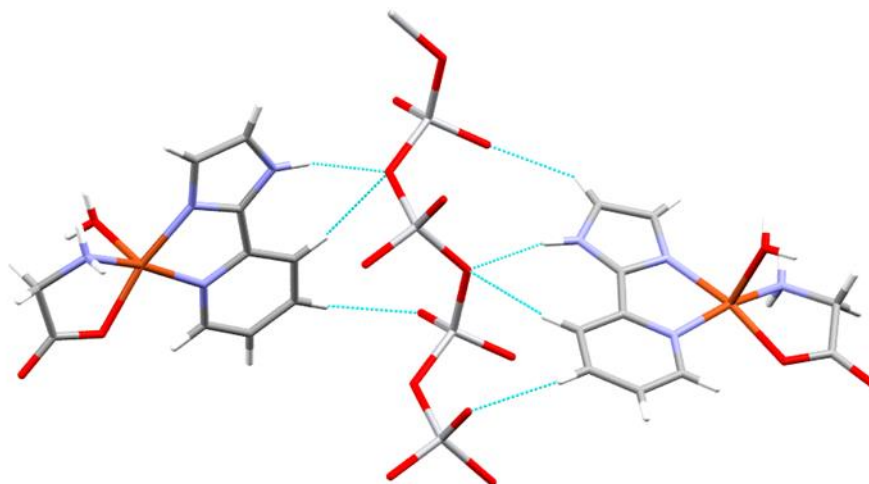

**Figure S2.** Capped stick representation of the hydrogen bond interactions of a growing metavanadate chain between layers of **Compound 2**.

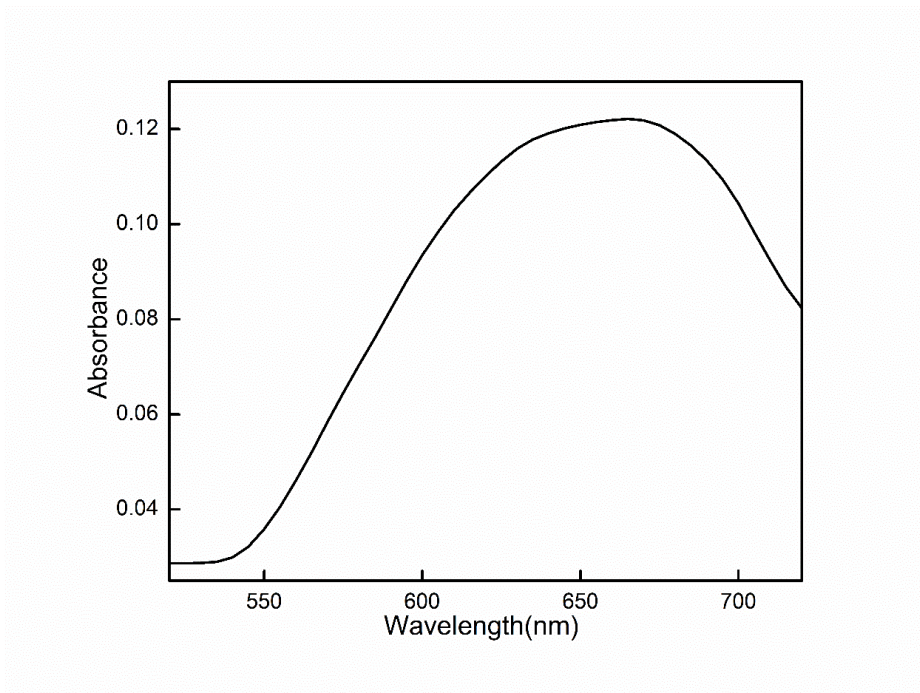

**Figure S3.** Visible spectrum of **Compound 1**.

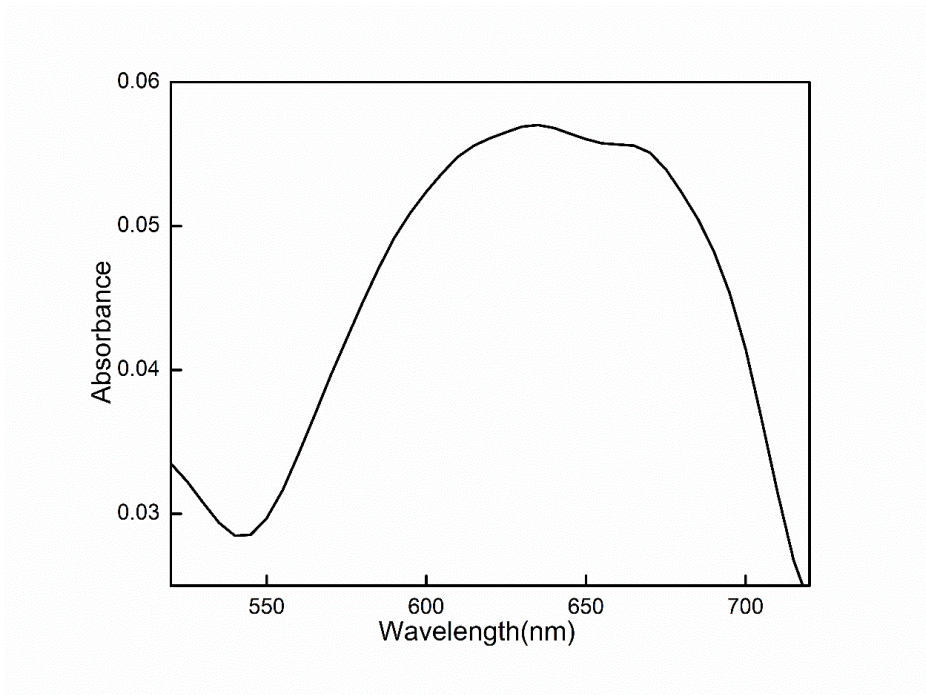

**Figure S4.** Visible Spectrum of **Compound 2**.

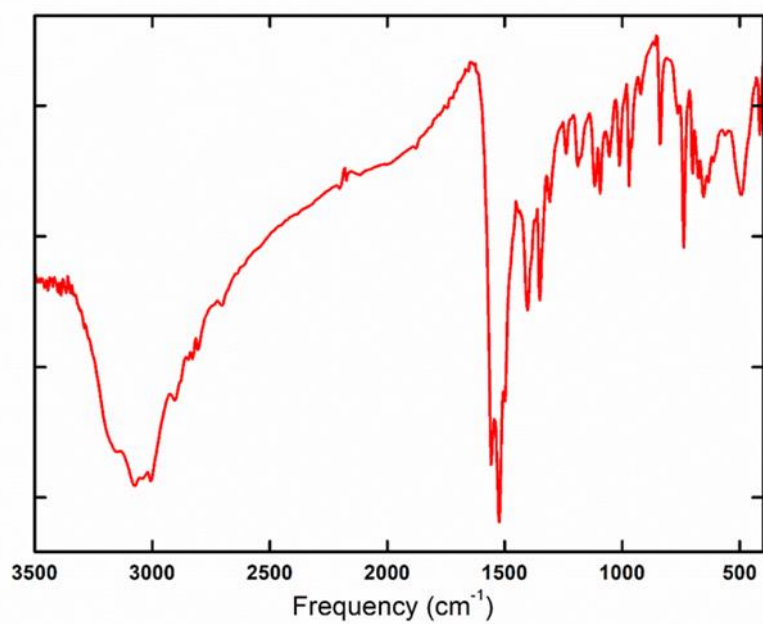

Figure S5. The infrared spectrum of **Compound 1**.

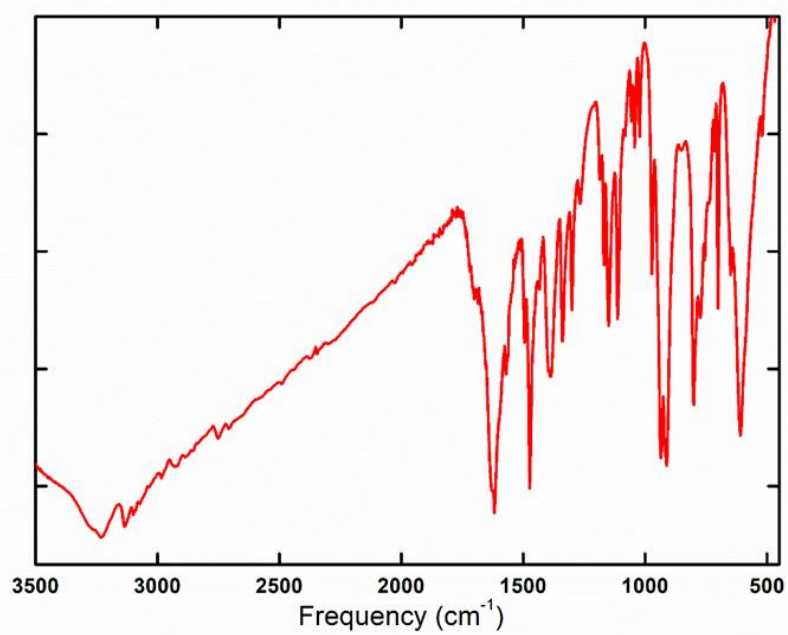

Figure S6. The infrared spectrum of **Compound 2**.

**Table S1.** Fractional atomic coordinates and isotropic or equivalent isotropic displacement parameters ( $\text{\AA}^2$ ) for **Compound 1**.

|      | X           | y           | z            | U <sub>iso</sub> */U <sub>eq</sub> |
|------|-------------|-------------|--------------|------------------------------------|
| Cu1  | 0.60984 (3) | 0.33069 (3) | 0.45565 (2)  | 0.03412 (10)                       |
| Cl2  | 0.87935 (8) | 0.19152 (7) | 0.46484 (7)  | 0.04906 (17)                       |
| Cl3  | 1.31805 (9) | 0.36561 (7) | 0.10889 (6)  | 0.05270 (19)                       |
| N8   | 0.8329 (3)  | 0.5067 (2)  | 0.22254 (19) | 0.0415 (5)                         |
| N6   | 0.8503 (2)  | 0.5601 (2)  | 0.44002 (18) | 0.0345 (4)                         |
| H6   | 0.934711    | 0.604433    | 0.438060     | 0.041*                             |
| N4   | 0.6887 (3)  | 0.4954 (2)  | 0.5736 (2)   | 0.0390 (5)                         |
| N18  | 0.5119 (2)  | 0.2687 (2)  | 0.58910 (18) | 0.0353 (4)                         |
| N11  | 0.6729 (3)  | 0.3966 (2)  | 0.32120 (19) | 0.0405 (5)                         |
| H11  | 0.621437    | 0.363299    | 0.249466     | 0.049*                             |
| N12  | 0.8668 (3)  | 0.6694 (2)  | 0.6516 (2)   | 0.0431 (5)                         |
| H12A | 0.839717    | 0.683245    | 0.727516     | 0.052*                             |
| H12B | 0.938672    | 0.718067    | 0.636080     | 0.052*                             |
| N20  | 0.4788 (2)  | 0.1737 (2)  | 0.34283 (19) | 0.0356 (4)                         |
| C5   | 0.7971 (3)  | 0.5723 (2)  | 0.5578 (2)   | 0.0305 (4)                         |
| C7   | 0.7815 (3)  | 0.4838 (2)  | 0.3250 (2)   | 0.0322 (4)                         |
| C13  | 0.4043 (3)  | 0.1693 (2)  | 0.5459 (2)   | 0.0352 (5)                         |
| C19  | 0.3841 (3)  | 0.1166 (2)  | 0.4060 (3)   | 0.0374 (5)                         |
| O25  | 0.8522 (3)  | 0.0861 (3)  | 0.1500 (3)   | 0.0846 (8)                         |
| H25A | 0.856553    | 0.101485    | 0.229323     | 0.127*                             |
| H25B | 0.946290    | 0.102207    | 0.134009     | 0.127*                             |
| O26  | 0.0441 (3)  | 0.1625 (3)  | -0.0146 (3)  | 0.0802 (8)                         |
| H26A | 0.111085    | 0.221718    | 0.026505     | 0.120*                             |
| H26B | 0.093067    | 0.095594    | -0.054527    | 0.120*                             |
| C17  | 0.5416 (4)  | 0.3186 (3)  | 0.7147 (3)   | 0.0468 (6)                         |
| H17  | 0.617209    | 0.385738    | 0.745258     | 0.056*                             |
| C14  | 0.3246 (3)  | 0.1207 (3)  | 0.6263 (3)   | 0.0494 (7)                         |
| H14  | 0.251129    | 0.052193    | 0.594172     | 0.059*                             |
| C15  | 0.3544 (4)  | 0.1739 (3)  | 0.7538 (3)   | 0.0562 (8)                         |
| H15  | 0.300440    | 0.142249    | 0.808812     | 0.067*                             |
| C24  | 0.2776 (3)  | 0.0157 (3)  | 0.3436 (3)   | 0.0501 (7)                         |
| H24  | 0.213652    | -0.022467   | 0.388091     | 0.060*                             |
| C21  | 0.4690 (4)  | 0.1287 (3)  | 0.2175 (3)   | 0.0471 (6)                         |

**Table S2.** Bond lengths for **Compound 1**.

| Atom-Atom | Length/Å   | Atom- Atom | Length/Å |
|-----------|------------|------------|----------|
| Cu1-Cl2   | 2.7562(8)  | N11-C7     | 1.300(3) |
| Cu1-N4    | 1.946(2)   | N12-C5     | 1.336(3) |
| Cu1-N18   | 2.0309(19) | N20-C19    | 1.361(3) |
| Cu1-N11   | 1.955(2)   | N20-C21    | 1.331(3) |
| Cu1-N20   | 2.044(2)   | C13-C19    | 1.489(4) |
| N8-C7     | 1.341(3)   | C13-C14    | 1.378(4) |
| N8-C9     | 1.460(4)   | C19-C24    | 1.387(4) |
| N8-C10    | 1.464(4)   | C17-C16    | 1.382(4) |
| N6-C5     | 1.385(3)   | C14-C15    | 1.370(4) |
| N6-C7     | 1.386(3)   | C15-C16    | 1.381(5) |
| N4-C5     | 1.288(3)   | C24-C23    | 1.374(4) |
| N18-C13   | 1.351(3)   | C21-C22    | 1.388(4) |
| N18-C17   | 1.347(3)   | C22-C23    | 1.362(5) |

**Table S3.** Bond Angles for **Compound 1**.

| Atom-Atom-Atom | Angle/°    | Atom-Atom-Atom | Angle/°  |
|----------------|------------|----------------|----------|
| N4-Cu1-Cl2     | 97.51(8)   | C21-N20-C19    | 118.1(2) |
| N4-Cu1-N18     | 94.52(8)   | N4-C5-N6       | 121.8(2) |
| N4-Cu1-N11     | 87.06(9)   | N4-C5-N12      | 123.6(2) |
| N4-Cu1-N20     | 167.29(9)  | N12-C5-N6      | 114.6(2) |
| N18-Cu1-Cl2    | 91.57(6)   | N8-C7-N6       | 116.3(2) |
| N18-Cu1-N20    | 80.11(8)   | N11-C7-N8      | 123.9(2) |
| N11-Cu1-Cl2    | 96.29(7)   | N11-C7-N6      | 119.8(2) |
| N11-Cu1-N18    | 171.72(9)  | N18-C13-C19    | 114.2(2) |
| N11-Cu1-N20    | 96.67(8)   | N18-C13-C14    | 121.9(2) |
| N20-Cu1-Cl2    | 94.16(6)   | C14-C13-C19    | 123.9(2) |
| C7-N8-C9       | 124.5(2)   | N20-C19-C13    | 115.2(2) |
| C7-N8-C10      | 119.4(2)   | N20-C19-C24    | 121.9(2) |
| C9-N8-C10      | 115.7(2)   | C24-C19-C13    | 122.8(2) |
| C7-N6-C5       | 126.71(19) | N18-C17-C16    | 123.1(3) |
| C5-N4-Cu1      | 127.86(17) | C15-C14-C13    | 119.6(3) |
| C13-N18-Cu1    | 115.76(16) | C14-C15-C16    | 119.6(3) |
| C17-N18-Cu1    | 126.44(17) | C23-C24-C19    | 118.1(3) |
| C17-N18-C13    | 117.8(2)   | N20-C21-C22    | 123.0(3) |
| C7-N11-Cu1     | 129.10(17) | C23-C22-C21    | 118.0(3) |
| C19-N20-Cu1    | 114.29(16) | C22-C23-C24    | 120.9(3) |
| C21-N20-Cu1    | 127.50(19) | C15-C16-C17    | 118.0(3) |

**Table S4.** Fractional atomic coordinates and isotropic or equivalent isotropic displacement parameters ( $\text{\AA}^2$ ) for **Compound 2**.

|      | X           | y            | z            | Uiso*/Ueq   |
|------|-------------|--------------|--------------|-------------|
| Cu1  | 0.71286 (4) | 0.68262 (10) | 0.40085 (2)  | 0.0266 (2)  |
| V2   | 0.95148 (4) | 0.21053 (12) | 0.77701 (3)  | 0.0258 (2)  |
| O3   | 0.5780 (2)  | 0.2371 (6)   | 0.24431 (14) | 0.0338 (6)  |
| N18  | 0.8797 (2)  | 1.0618 (8)   | 0.56768 (16) | 0.0364 (8)  |
| H18  | 0.895209    | 1.070954     | 0.611129     | 0.044*      |
| O19  | 0.5638 (2)  | 0.9166 (5)   | 0.37357 (13) | 0.0319 (5)  |
| H19A | 0.508442    | 0.857080     | 0.333968     | 0.048*      |
| H19B | 0.571980    | 1.095987     | 0.363003     | 0.048*      |
| O20  | 0.9583 (2)  | -0.0180 (6)  | 0.71170 (13) | 0.0336 (6)  |
| O7   | 0.6426 (2)  | 0.3841 (6)   | 0.34934 (13) | 0.0328 (6)  |
| O21  | 0.8321 (3)  | 0.3158 (8)   | 0.7599 (2)   | 0.0621 (11) |
| N8   | 0.6923 (2)  | 0.5624 (7)   | 0.48928 (15) | 0.0301 (6)  |
| N6   | 0.7568 (3)  | 0.7441 (7)   | 0.31774 (16) | 0.0309 (6)  |
| H6A  | 0.761922    | 0.911580     | 0.310962     | 0.037*      |
| H6B  | 0.818598    | 0.671499     | 0.322041     | 0.037*      |
| C9   | 0.7508 (3)  | 0.6896 (8)   | 0.54480 (19) | 0.0312 (8)  |
| N15  | 0.8077 (2)  | 0.9312 (6)   | 0.46295 (15) | 0.0285 (6)  |
| C5   | 0.6752 (3)  | 0.6282 (7)   | 0.26056 (17) | 0.0292 (7)  |
| H5A  | 0.705772    | 0.576026     | 0.225537     | 0.035*      |
| H5B  | 0.621080    | 0.753855     | 0.241225     | 0.035*      |
| C4   | 0.6277 (3)  | 0.3978 (7)   | 0.28474 (17) | 0.0264 (6)  |
| C16  | 0.8714 (3)  | 1.1377 (9)   | 0.4610 (2)   | 0.0339 (7)  |
| H16  | 0.882079    | 1.209382     | 0.422362     | 0.041*      |
| O22  | 0.9773 (4)  | 0.0592 (7)   | 0.84923 (16) | 0.0569 (9)  |
| C17  | 0.9163 (3)  | 1.2180 (8)   | 0.5270 (2)   | 0.0365 (8)  |
| H17  | 0.962892    | 1.353643     | 0.541011     | 0.044*      |
| C12  | 0.6186 (4)  | 0.3148 (10)  | 0.5606 (2)   | 0.0444 (10) |
| H12  | 0.572563    | 0.186789     | 0.564790     | 0.053*      |
| C14  | 0.8147 (3)  | 0.8906 (8)   | 0.52742 (17) | 0.0294 (7)  |
| C13  | 0.6282 (3)  | 0.3780 (9)   | 0.4978 (2)   | 0.0377 (8)  |
| H13  | 0.588376    | 0.288458     | 0.459888     | 0.045*      |
| C10  | 0.7464 (3)  | 0.6355 (10)  | 0.6094 (2)   | 0.0402 (9)  |
| H10  | 0.787591    | 0.724344     | 0.646940     | 0.048*      |
| C11  | 0.6777 (4)  | 0.4430 (10)  | 0.6163 (2)   | 0.0466 (10) |
| H11  | 0.672426    | 0.402222     | 0.659001     | 0.056*      |

**Table S5.** Bond lengths for **Compound 2**.

| Atom-Atom          | Length/Å   | Atom- Atom         | Length/Å   |
|--------------------|------------|--------------------|------------|
| Cu1-N2             | 1.9884(17) | N2-C7              | 1.375(3)   |
| Cu1-O1             | 1.9609(15) | N3-C6              | 1.346(3)   |
| Cu1-N4             | 1.9925(18) | N3-C8              | 1.369(3)   |
| Cu1-O3             | 2.2633(17) | C9-C10             | 1.512(3)   |
| Cu1-N1             | 2.0253(16) | C9-O1              | 1.292(2)   |
| V1-O4              | 1.6276(18) | C9-O2              | 1.234(2)   |
| V1-O5              | 1.8325(16) | C10-N4             | 1.478(3)   |
| V1-O5 <sup>1</sup> | 1.8224(15) | O5-V1 <sup>2</sup> | 1.8225(15) |
| V1-O6              | 1.6244(19) | C2-C1              | 1.383(3)   |
| C5-C6              | 1.457(3)   | C2-C3              | 1.367(4)   |
| C5-C4              | 1.380(3)   | C8-C7              | 1.374(3)   |
| C5-N1              | 1.356(3)   | C1-N1              | 1.338(3)   |
| N2-C6              | 1.333(3)   | C3-C4              | 1.379(4)   |

**Table S6.** Bond Angles for **Compound 2**.

| Atom-Atom-Atom         | Angle/°    | Atom-Atom-Atom         | Angle/°    |
|------------------------|------------|------------------------|------------|
| N2-Cu1-N4              | 98.91(7)   | C7-N2-Cu1              | 140.96(15) |
| N2-Cu1-O3              | 99.04(7)   | C6-N3-C8               | 107.59(18) |
| N2-Cu1-N1              | 81.75(7)   | O1-C9-C10              | 115.88(17) |
| O1-Cu1-N2              | 167.50(7)  | O2-C9-C10              | 120.80(18) |
| O1-Cu1-N4              | 82.75(7)   | O2-C9-O1               | 123.31(19) |
| O1-Cu1-O3              | 92.87(7)   | N4-C10-C9              | 109.57(16) |
| O1-Cu1-N1              | 94.02(7)   | C9-O1-Cu1              | 114.75(13) |
| N4-Cu1-O3              | 99.42(7)   | N2-C6-C5               | 119.34(18) |
| N4-Cu1-N1              | 167.74(8)  | N2-C6-N3               | 110.6(2)   |
| N1-Cu1-O3              | 92.54(6)   | N3-C6-C5               | 129.99(18) |
| O4-V1-O5               | 107.50(9)  | V1 <sup>2</sup> -O5-V1 | 125.87(8)  |
| O4-V1-O5 <sup>1</sup>  | 108.49(9)  | C3-C2-C1               | 119.5(2)   |
| O5 <sup>1</sup> -V1-O5 | 115.09(3)  | C10-N4-Cu1             | 107.10(13) |
| O6-V1-O4               | 107.04(13) | N3-C8-C7               | 106.8(2)   |
| O6-V1-O5 <sup>1</sup>  | 108.79(9)  | C8-C7-N2               | 108.3(2)   |
| O6-V1-O5               | 109.63(10) | N1-C1-C2               | 121.7(2)   |
| C4-C5-C6               | 125.7(2)   | C2-C3-C4               | 119.5(2)   |
| N1-C5-C6               | 112.29(17) | C3-C4-C5               | 118.7(2)   |
| N1-C5-C4               | 122.0(2)   | C5-N1-Cu1              | 114.18(14) |
| C6-N2-Cu1              | 112.35(15) | C1-N1-Cu1              | 127.22(15) |
| C6-N2-C7               | 106.68(18) | C1-N1-C5               | 118.60(18) |



**Table S7.** Compiled Bonds (Å) and Angles (°) for Selected Extended Vanadate Structures.

|         | NaVO <sub>3</sub> | NH <sub>4</sub> VO <sub>3</sub> | KVO <sub>3</sub> | Compound 2 |
|---------|-------------------|---------------------------------|------------------|------------|
| VO1     | 1.653(1)          | 1.640(4)                        | 1.643(6)         | 1.6276(18) |
| VO2     | 1.643(1)          | 1.647(4)                        | 1.639(6)         | 1.6244(19) |
| VO3     | 1.882(3)          | 1.803(1)                        | 1.806(2)         | 1.8224(15) |
| VO4     | -                 | -                               | -                | 1.8325(16) |
| O1-V-O2 | 108.45(7)         | 107.3(1)                        | 110.1(3)         | 107.50(9)  |
| O1-V-O3 | 135.75(6)         | 111.0(3)                        | 111.5(2)         | 108.49(9)  |
| O2-V-O3 | 115.60(7)         | 110.2(2)                        | 110.0(2)         | 115.09(3)  |
